# Supplementary material
Source: PubMed Central journal article supplement (PMC5069711)
Supplement: Supp_Tables1-3.pdf [file Supp_Tables1-3.pdf]

## Supplementary Data

SUPPLEMENTARY TABLE S1. LUMBAR SPINE, TOTAL HIP, AND CUMULATIVE SITE BONE MINERAL DENSITY BY FITNESS CATEGORIES

|                                              | <i>Low fit<sup>a</sup>, N = 120</i> | <i>Moderate fit<sup>a</sup>, N = 461</i> | <i>High fit<sup>a</sup>, N = 1,139</i> |
|----------------------------------------------|-------------------------------------|------------------------------------------|----------------------------------------|
| <b>Lumbar spine (L1–L4)</b>                  |                                     |                                          |                                        |
| Bone mineral density (g/cm <sup>2</sup> )    | 1.15 ± 0.16                         | 1.16 ± 0.17                              | 1.14 ± 0.16                            |
| T-score                                      | -0.22 ± 1.33                        | -0.15 ± 1.44                             | -0.36 ± 1.36                           |
| Osteoporosis                                 | 4 (3.3)                             | 17 (3.7)                                 | 56 (4.9)                               |
| Osteopenia                                   | 27 (22.5)                           | 118 (25.6)                               | 322 (28.3)                             |
| Normal                                       | 89 (74.2)                           | 326 (70.7)                               | 761 (66.8)                             |
| <b>Total hip</b>                             |                                     |                                          |                                        |
| Bone mineral density (g/cm <sup>2</sup> )    | 0.94 ± 0.14                         | 0.94 ± 0.13                              | 0.93 ± 0.12                            |
| T-score                                      | -0.56 ± 1.08                        | -0.53 ± 1.03                             | -0.66 ± 0.95                           |
| Osteoporosis                                 | 3 (2.5)                             | 9 (2.0)                                  | 31 (2.7)                               |
| Osteopenia                                   | 42 (35.0)                           | 148 (32.1)                               | 386 (33.9)                             |
| Normal                                       | 75 (62.5)                           | 304 (65.9)                               | 722 (63.4)                             |
| <b>Cumulative skeletal sites<sup>b</sup></b> |                                     |                                          |                                        |
| T-score                                      | -1.15 ± 0.99                        | -1.06 ± 0.99                             | -1.15 ± 0.95                           |
| Osteoporosis                                 | 9 (7.5)                             | 27 (5.9)                                 | 95 (8.3)                               |
| Osteopenia                                   | 55 (45.8)                           | 222 (48.2)                               | 560 (49.2)                             |
| Normal                                       | 56 (46.7)                           | 212 (46.0)                               | 484 (42.5)                             |

Data presented as mean ± SD or *N* (%) when categorical.

<sup>a</sup>Low fit, category 1 age-defined cut points of cardiorespiratory fitness; moderate fit, categories 2–3; high fit, categories 4–5.

<sup>b</sup>Minimum T-score of femoral neck, L1–L4, and total hip.

SUPPLEMENTARY TABLE S2. ODDS RATIO TO PREDICT RISK OF T-SCORE  $\leq -2.5$   
WITH FITNESS MODELED CATEGORICALLY, FULLY ADJUSTED MODEL

|                                               | <i>T-score at hip <math>\leq -2.5</math></i> |          | <i>T-score L1-L4 <math>\leq -2.5</math></i> |          | <i>Cumulative T-score <math>\leq -2.5</math></i> |          |
|-----------------------------------------------|----------------------------------------------|----------|---------------------------------------------|----------|--------------------------------------------------|----------|
|                                               | <i>Odds ratio<br/>(95% CI)</i>               | <i>p</i> | <i>Odds ratio<br/>(95% CI)</i>              | <i>p</i> | <i>Odds ratio<br/>(95% CI)</i>                   | <i>p</i> |
| Age (per 10 years)                            | 1.72 (1.17–2.53)                             | 0.006    | 2.17 (1.61–2.93)                            | <0.001   | 1.93 (1.51–2.46)                                 | <0.001   |
| Weight (per 5 kg)                             | 0.56 (0.45–0.68)                             | <0.001   | 0.74 (0.65–0.84)                            | <0.001   | 0.69 (0.62–0.76)                                 | <0.001   |
| Moderate fit versus low fit <sup>a</sup>      | 0.46 (0.12–1.84)                             | 0.273    | 0.73 (0.23–2.28)                            | 0.583    | 0.47 (0.20–1.08)                                 | 0.074    |
| High fit versus low fit <sup>a</sup>          | 0.48 (0.13–1.75)                             | 0.269    | 0.76 (0.25–2.29)                            | 0.629    | 0.51 (0.23–1.12)                                 | 0.093    |
| Resistance activity, 2–7 versus 0–1 days/week | 0.29 (0.13–0.64)                             | 0.002    | 0.94 (0.58–1.55)                            | 0.820    | 0.73 (0.49–1.08)                                 | 0.113    |

<sup>a</sup>Low fit, category 1 age-defined cut points of cardiorespiratory fitness; moderate fit, categories 2–3; high fit, categories 4–5.  
CI, confidence interval.

SUPPLEMENTARY TABLE S3. ODDS RATIO TO PREDICT RISK OF T-SCORE  $\leq -1.0$   
WITH FITNESS MODELED CATEGORICALLY, FULLY ADJUSTED MODEL

|                                               | <i>T-score at hip <math>\leq -1.0</math></i> |          | <i>T-score L1-L4 <math>\leq -1.0</math></i> |          | <i>Cumulative T-score <math>\leq -1.0</math></i> |          |
|-----------------------------------------------|----------------------------------------------|----------|---------------------------------------------|----------|--------------------------------------------------|----------|
|                                               | <i>Odds ratio<br/>(95% CI)</i>               | <i>p</i> | <i>Odds ratio<br/>(95% CI)</i>              | <i>p</i> | <i>Odds ratio<br/>(95% CI)</i>                   | <i>p</i> |
| Age (per 10 years)                            | 1.57 (1.35–1.83)                             | <0.001   | 1.25 (1.07–1.44)                            | 0.004    | 1.57 (1.35–1.83)                                 | <0.001   |
| Weight (per 5 kg)                             | 0.76 (0.72–0.80)                             | <0.001   | 0.85 (0.81–0.90)                            | <0.001   | 0.80 (0.76–0.84)                                 | <0.001   |
| Moderate fit versus low fit <sup>a</sup>      | 0.52 (0.33–0.83)                             | 0.006    | 0.90 (0.56–1.45)                            | 0.676    | 0.66 (0.43–1.03)                                 | 0.068    |
| High fit versus low fit <sup>a</sup>          | 0.40 (0.26–0.64)                             | <0.001   | 0.87 (0.55–1.39)                            | 0.564    | 0.54 (0.35–0.85)                                 | 0.007    |
| Resistance activity, 2–7 versus 0–1 days/week | 0.91 (0.73–1.14)                             | 0.420    | 0.95 (0.76–1.18)                            | 0.638    | 0.97 (0.78–1.20)                                 | 0.777    |

<sup>a</sup>Low fit, category 1 age-defined cut points of cardiorespiratory fitness; moderate fit, categories 2–3; high fit, categories 4–5.
